# Supplementary material for: Photosensitive Poly-l-lysine/Heparin Interpolyelectrolyte Complexes for Delivery of Genetic Drugs
Source: PubMed Central journal article supplement (PMC7285230; doi:10.3390/polym12051077), 2020-05-08
Supplement: polymers-12-01077-s001.pdf [file polymers-12-01077-s001.pdf]

Supporting information

## Photo-sensitive poly-L-lysine/heparin interpolyelectrolyte complexes for delivery of genetic drugs

Viktor Korzhikov-Vlakh<sup>1\*</sup>, Iuliia Katernuk<sup>1</sup>, Antonina Lavrentieva<sup>2</sup>, Ivan Guryanov<sup>1</sup>, Vladimir Sharoyko<sup>1</sup>, Alina A. Manshina<sup>1</sup>, Tatiana B. Tennikova<sup>1</sup>

<sup>1</sup> Saint Petersburg State University, Institute of Chemistry, St. Petersburg, Peterhoff, 198504, Universitetskii pr. 26, Russia; [v.korzhikov-vlakh@spbu.ru](mailto:v.korzhikov-vlakh@spbu.ru) (V.K.-V.); [katernuk02@gmail.com](mailto:katernuk02@gmail.com) (I.K.); [ivan.guryanov1@gmail.com](mailto:ivan.guryanov1@gmail.com) (I.G.); [sharoyko@gmail.com](mailto:sharoyko@gmail.com) (V.S.); [a.manshina@spbu.ru](mailto:a.manshina@spbu.ru) (A.A.M.); [tennikova@mail.ru](mailto:tennikova@mail.ru) (T.B.T.)

<sup>2</sup> Institute of Technical Chemistry, Leibniz University, Callinstrasse 5, 30167, Hannover, Germany; [lavrentieva@iftc.uni-hannover.de](mailto:lavrentieva@iftc.uni-hannover.de) (A.L.)

\* Correspondence: [v.korzhikov-vlakh@spbu.ru](mailto:v.korzhikov-vlakh@spbu.ru); Tel.: +7-(921)-420-8127

**Table S1.** The effect of [Monomer]:[Initiator] molar ratio on the  $M_n$  of obtained PLL. Conditions: Monomer (NCA of Lys) concentration – 4 wt.%; initiation with *n*-hexylamine;  $T = 25\text{ }^\circ\text{C}$ ; reaction in 1,4-dioxane during 48 hours. The  $M_n$  was determined by GPC in DMF for polymers prior to deprotection with application of PMMA standards ( $10 - 50 \times 10^3$  g/mol).

| Sample # | [M]/[I],<br>mol/mol | $M_n$ | $\bar{D}$ |
|----------|---------------------|-------|-----------|
| 1        | 250                 | 51000 | 1.4       |
| 2        | 200                 | 33000 | 1.3       |
| 3        | 150                 | 8000  | 2.5       |
| 4        | 100                 | 7000  | 1.8       |
| 5        | 50                  | 5000  | 1.6       |

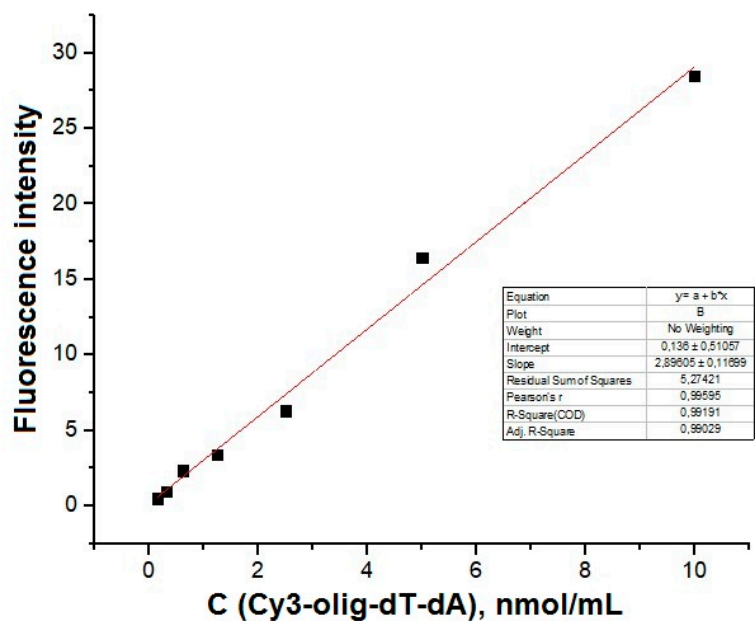

**Figure S1.** Calibration curve showing the dependence of the fluorescence intensity ( $\lambda_{ex} = 550 \text{ nm}$ ,  $\lambda_{em} = 570 \text{ nm}$ ) of the solution on the concentration of Cy3-oligo-dT-dA, plotted to determine the amount of encapsulated oligonucleotide as well as to quantify its release.

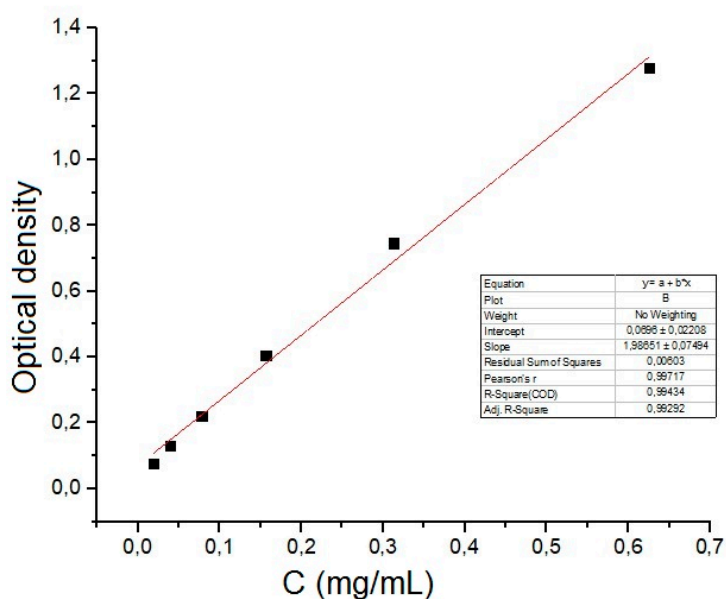

**Figure S2.** A calibration curve showing the linear dependence of the optical density of the solution on the concentration of the photo-sensitive linker. The curve was plotted to determine the content of unbound linker upon conjugation with PLL. The absorption was measured at a wavelength of 325 nm. The molar extinction coefficient was estimated as  $\epsilon = 619 \text{ L mol}^{-1} \text{ cm}^{-1}$ .

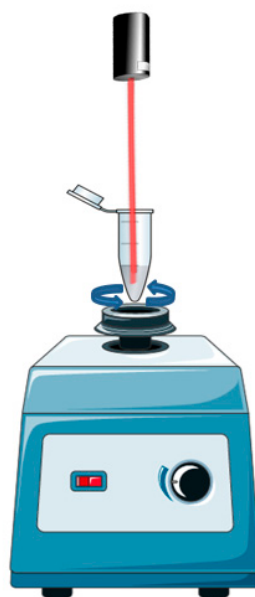

**Figure S3.** The scheme of the installation for irradiation of IPECs with a 325 nm laser.

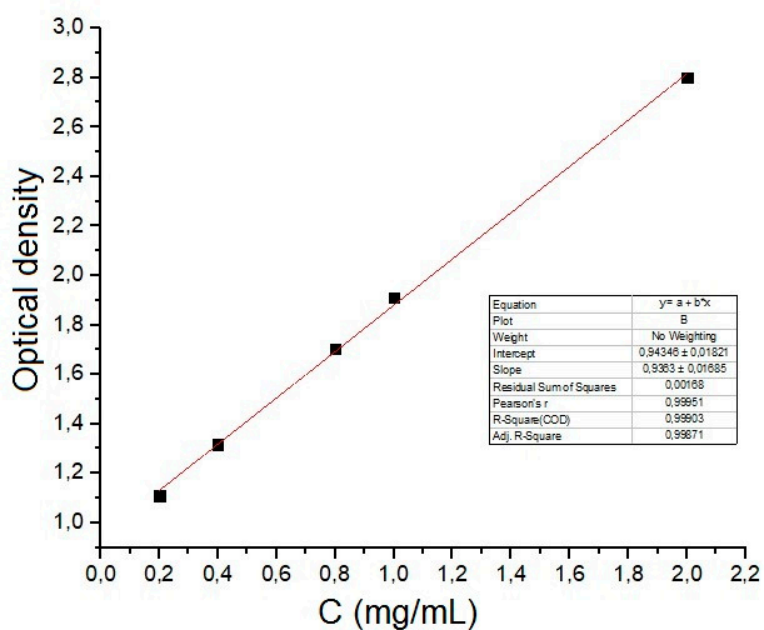

**Figure S4.** Calibration curve showing the dependence of the optical density of the solution on the concentration of 3-nitro-4-formylbenzoic acid, plotted to determine the amount of released decomposition product, which entered into a qualitative reaction with Schiff's reagent. The absorption was measured at a wavelength of 550 nm. The molar extinction coefficient was estimated to be  $\epsilon = 1521 \text{ L mol}^{-1} \text{ cm}^{-1}$ .

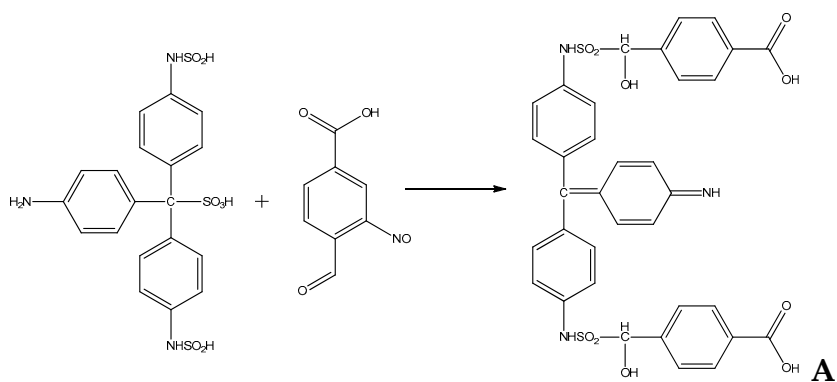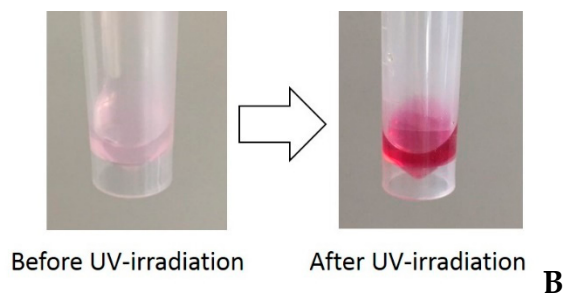

**Figure S5.** Reaction of linker decomposition aldehyde product with Schiff's reagent (A); colour reaction with Schiff's reagent, used for photo-colormetric quantification of the reaction.

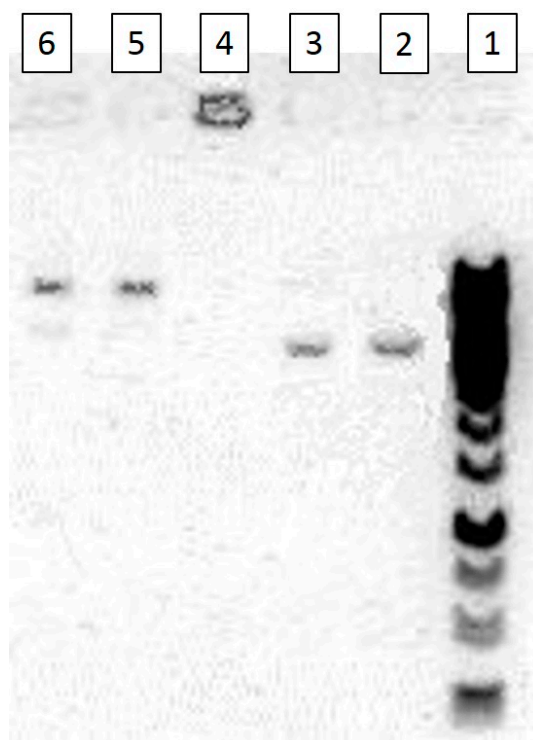

**Figure S6.** Agarose gel electrophoresis: (1) – ladder; (2,3) – pDNA; (4) – pLys+pDNA; (5) – pLys+pDNA+4xHep; (6) – pLys+pDNA+8xHep.

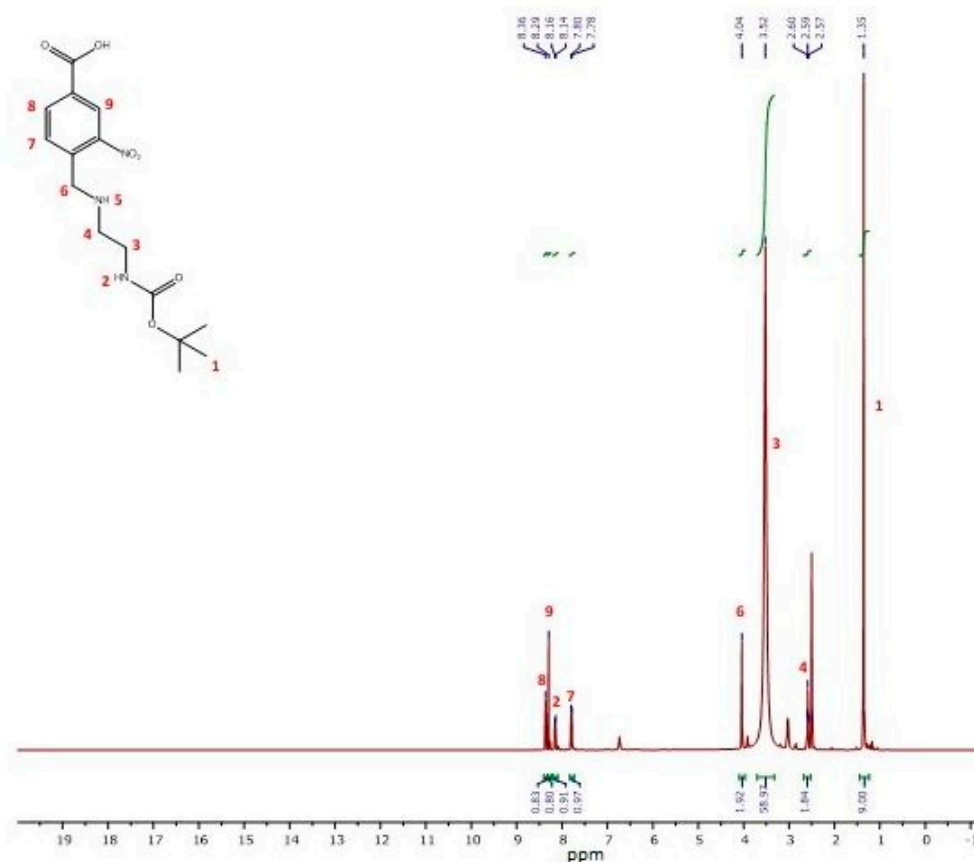

**Figure S7.** The <sup>1</sup>H NMR spectrum of 4-(((2-((tert-butoxycarbonyl)amino)ethyl)amino)methyl)-3-nitrobenzoic acid.

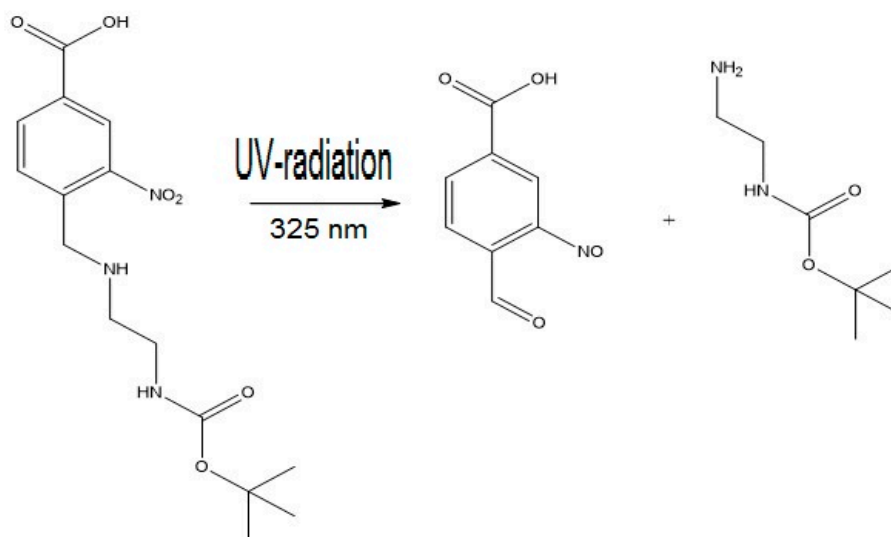

**Figure S8.** Linker 4-(((2-((tert-butoxycarbonyl)amino)ethyl)amino)methyl)-3-nitrobenzoic acid decomposition under UV radiation at  $\lambda = 325$  nm.

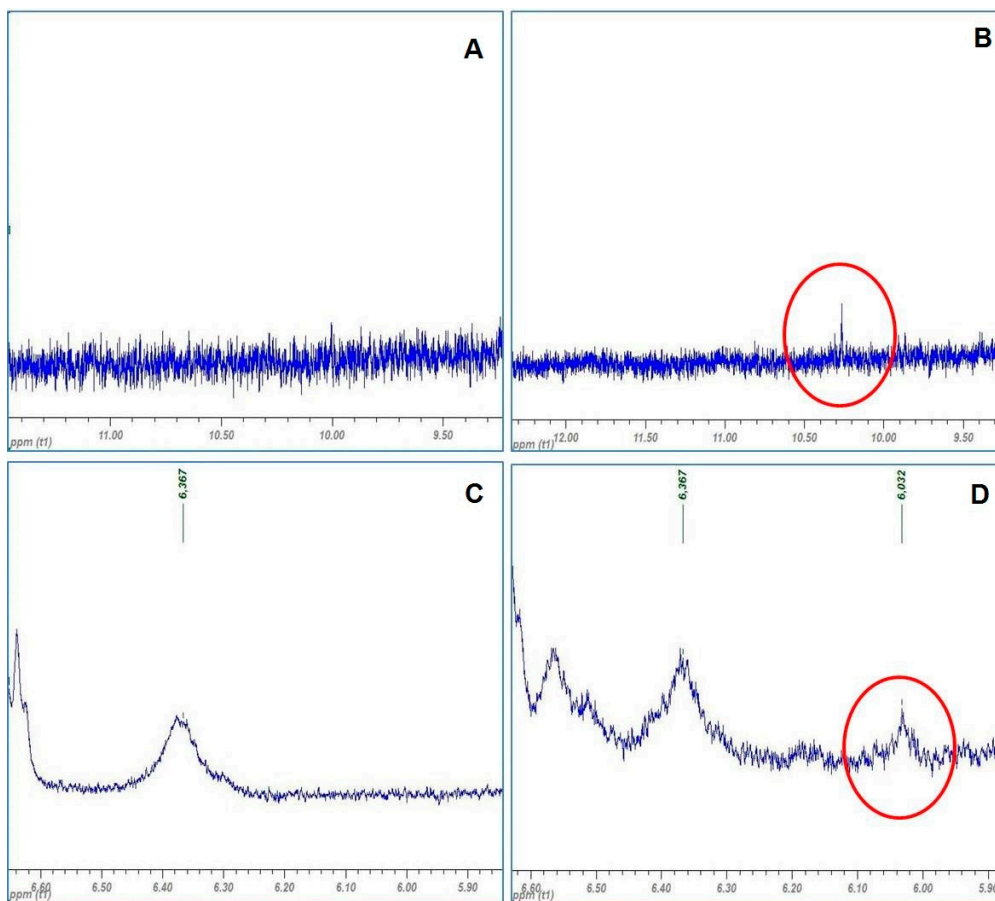

**Figure S9.** Differences in the  $^1\text{H}$  NMR spectra of the initial linker (A, C) and its photodestruction product (B, D) when irradiated with a laser with a wavelength of 325 nm with a power of  $3\text{ W/cm}^2$  for 15 minutes. The signal of aldehyde (B) and hemiacetal (D) groups were detected. Spectra were obtained in DMSO- $d_6$ .

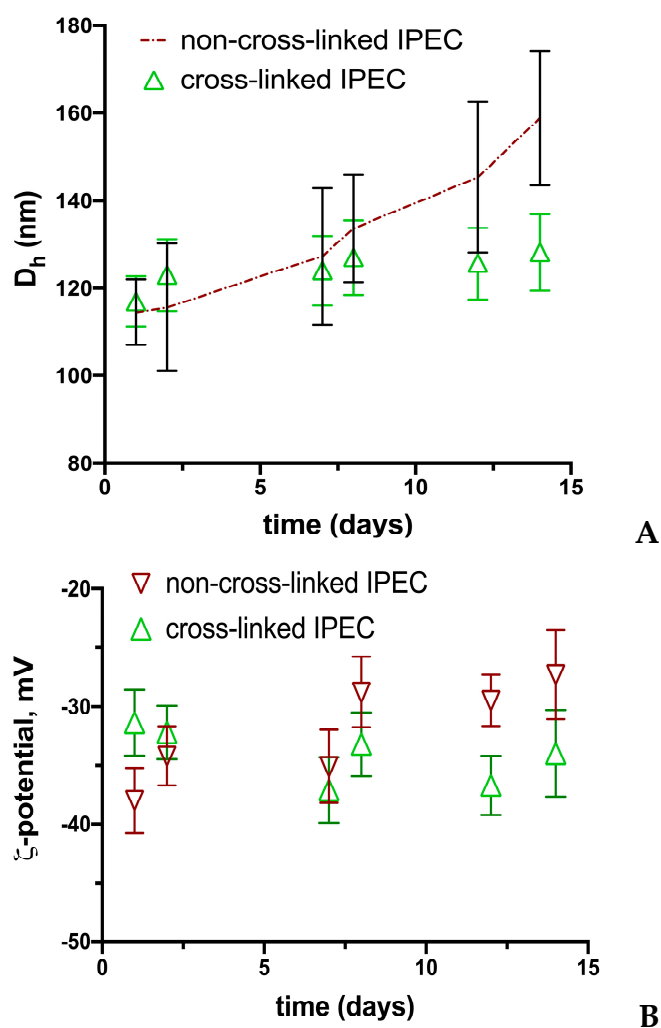

**Figure S10.** Stability of IPECS: particles hydrodynamic diameter (A) and  $\zeta$ -potential (B) change with time. Conditions: 0.1 M PBS buffer solution, pH 7.4; particles concentration 0.1 mg/mL, 37 °C.

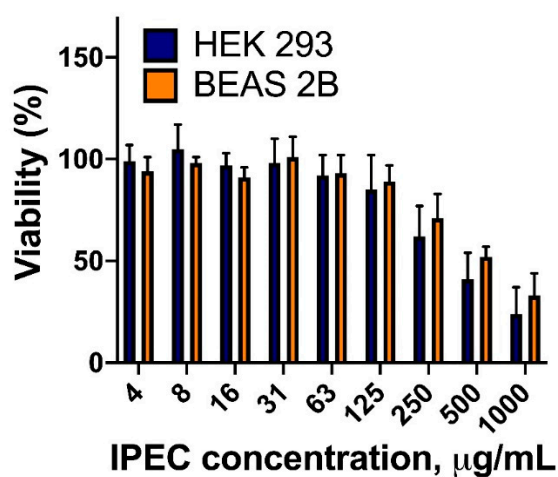

**Figure S11.** CTB test: viability of HEK 293 and BEAS 2B cells incubated with different concentrations of photo-sensitive linker (see Figure 5, compound 3).

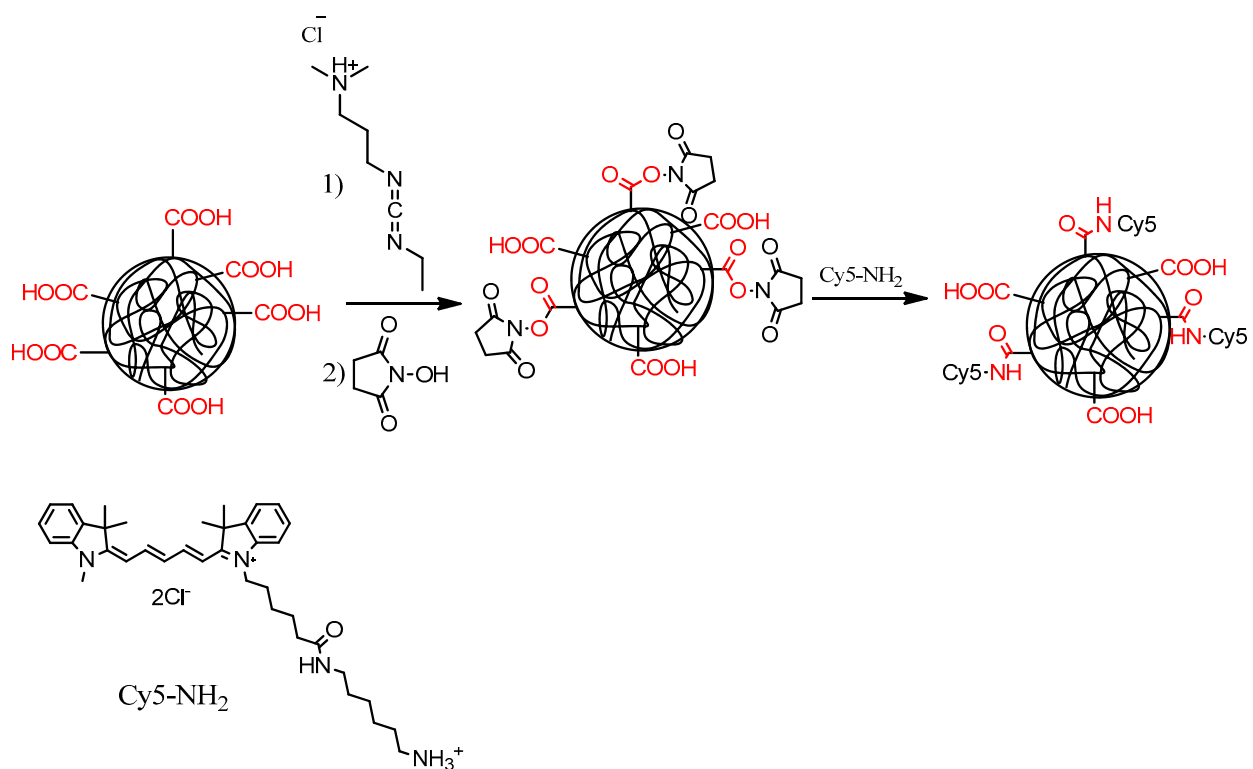

**Figure S12.** Modification of IPECs by amino-Cy5 probe.

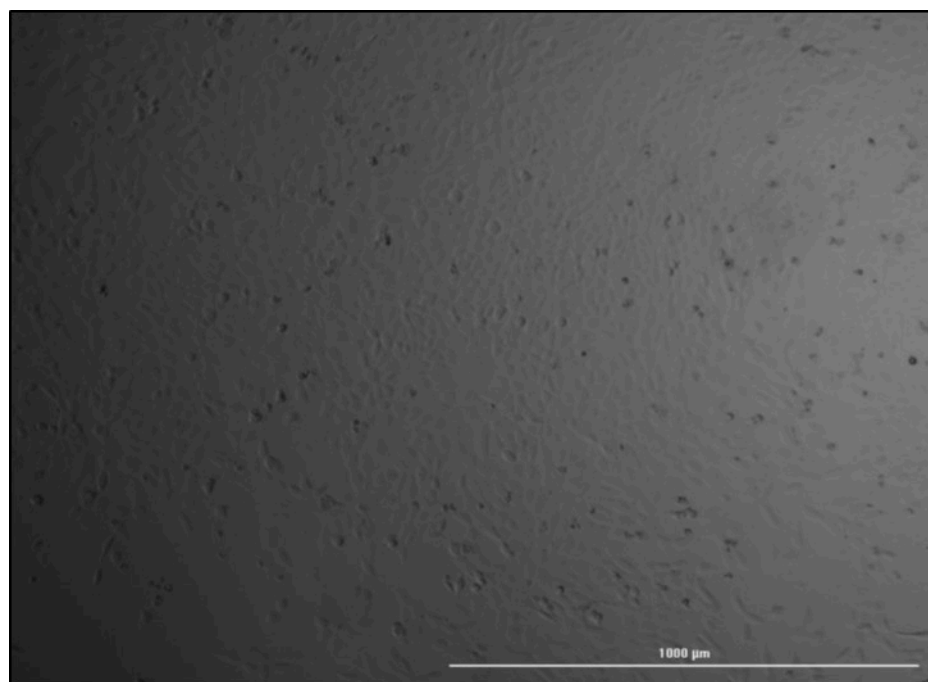

**Figure S13.** Optical microscopy: mouse fibroblast cells (NIH-3T3) morphology after exposure to 325 nm laser.
